# Supplementary material for: Postmortem Protein Degradation as a Tool to Estimate the PMI: A Systematic Review
Source: MDPI journal article supplement (doi:10.3390/diagnostics10121014), 2020-11-26
Supplement: s1 [file s1]

| protein                                                                                                                  | abbreviation                 | method                             | tissue                                                     | reference                      |
|--------------------------------------------------------------------------------------------------------------------------|------------------------------|------------------------------------|------------------------------------------------------------|--------------------------------|
| A disintegrin and metalloproteinase with thrombospondin motifs 17                                                        | ADAMTS17                     | mass spectrometry                  | bone                                                       | Prieto-Bonete et al. 2018 [25] |
| A disintegrin and metalloproteinase with thrombospondin motifs 18                                                        | ADAMTS18                     | mass spectrometry                  | bone                                                       | Prieto-Bonete et al. 2018 [25] |
| acetyl-coenzyme A acyltransferase 2                                                                                      |                              | 2D-PAGE                            | liver                                                      | Kwak et al. 2017 [52]          |
| acetylcholinesterase                                                                                                     | AChE                         | enzyme activity assay              | brain, liver, skeletal muscle, kidney                      | da Fonseca et al. 2019 [60]    |
| actin                                                                                                                    |                              | western blot                       | heart, liver, spleen, lung, kidney, brain, skeletal muscle | Li et al. 2016 [27]            |
| actin                                                                                                                    |                              | immunohistochemistry               | heart, skeletal muscle                                     | Li et al. 2016 [27]            |
| adenosine kinase                                                                                                         |                              | 2D-PAGE                            | liver                                                      | Kwak et al. 2017 [52]          |
| adenosine triphosphate synthase, H <sup>+</sup> -transporting, mitochondrial F1 complex, alpha subunit 1, cardiac muscle |                              | 2D-PAGE                            | heart                                                      | Kwak et al. 2017 [52]          |
| aggrecan                                                                                                                 |                              | western blot                       | cartilage                                                  | Bolton et al. 2015 [56]        |
| albumin                                                                                                                  | ALBU                         | mass spectrometry                  | bone                                                       | Procopio et al. 2018 [59]      |
| aldehyde dehydrogenase, mitochondrial precursor                                                                          |                              | 2D-PAGE                            | liver                                                      | Kwak et al. 2017 [52]          |
| aldolase A                                                                                                               |                              | 2D-PAGE                            | heart                                                      | Kwak et al. 2017 [52]          |
| alpha 1 type XXIV collagen precursor                                                                                     | COL24A1                      | mass spectrometry                  | bone                                                       | Prieto-Bonete et al. 2018 [25] |
| alpha actinin                                                                                                            |                              | western blot                       | skeletal muscle                                            | Foditsch et al. 2016 [57]      |
| alpha actinin                                                                                                            |                              | western blot                       | skeletal muscle                                            | Pittner et al. 2016 [23]       |
| alpha B-crystalline                                                                                                      |                              | 2D-PAGE                            | heart                                                      | Kwak et al. 2017 [52]          |
| alpha enolase                                                                                                            |                              | 2D-PAGE                            | liver                                                      | Kwak et al. 2017 [52]          |
| alpha-2-HS-glycoprotein                                                                                                  | AHSG                         | mass spectrometry                  | bone                                                       | Prieto-Bonete et al. 2018 [25] |
| AMP-activated protein kinase $\alpha$                                                                                    | AMPK- $\alpha$               | western blot                       | skeletal muscle                                            | Lee et al. 2016 [50]           |
| amphiregulin preproprotein                                                                                               | AREG                         | mass spectrometry                  | bone                                                       | Prieto-Bonete et al. 2018 [25] |
| annexin A1                                                                                                               | ANXA1                        | mass spectrometry                  | bone                                                       | Procopio et al. 2018 [59]      |
| annexin II receptor                                                                                                      | ANXA2R                       | mass spectrometry                  | bone                                                       | Prieto-Bonete et al. 2018 [25] |
| apolipoprotein A1                                                                                                        | APOA1                        | mass spectrometry                  | bone                                                       | Procopio et al. 2018 [59]      |
| apolipoprotein C3                                                                                                        | APOC3                        | mass spectrometry                  | bone                                                       | Procopio et al. 2018 [59]      |
| arginase-1                                                                                                               |                              | 2D-PAGE                            | liver                                                      | Kwak et al. 2017 [52]          |
| beta catenin                                                                                                             |                              | western blot                       | skeletal muscle                                            | Lee et al. 2016 [50]           |
| beta enolase                                                                                                             | ENOB                         | mass spectrometry                  | bone                                                       | Procopio et al. 2018 [59]      |
| beta-catenin 1                                                                                                           | CTNNB                        | mass spectrometry                  | bone                                                       | Prieto-Bonete et al. 2018 [25] |
| bone morphogenetic protein 5 preproprotein                                                                               | BMP5                         | mass spectrometry                  | bone                                                       | Prieto-Bonete et al. 2018 [25] |
| c alpha-1(II) chain                                                                                                      | COL2A1                       | mass spectrometry                  | bone                                                       | Prieto-Bonete et al. 2018 [25] |
| Ca <sup>2+</sup> /calmodulin-dependent protein kinase II                                                                 | CaMKII                       | western blot                       | lung, skeletal muscle                                      | Kang et al. 2003 [48]          |
| Ca <sup>2+</sup> /calmodulin-dependent protein kinase II                                                                 | CaMKII                       | western blot                       | lung, skeletal muscle                                      | Poloz and O'Day 2009 [24]      |
| cadherin-11                                                                                                              | CDH11                        | mass spectrometry                  | bone                                                       | Prieto-Bonete et al. 2018 [25] |
| calcineurin A                                                                                                            | CnA                          | western blot                       | lung, skeletal muscle                                      | Kang et al. 2003 [48]          |
| calcineurin A                                                                                                            | CnA                          | western blot                       | lung, skeletal muscle                                      | Poloz and O'Day 2009 [24]      |
| calcitonin                                                                                                               |                              | immunohistochemistry               | thyroid gland                                              | Ortmann et al. 2017 [43]       |
| calcitonin                                                                                                               |                              | immunohistochemistry               | thyroid gland                                              | Wehner et al. 2001 [32]        |
| calpain 1 ( $\mu$ -calpain)                                                                                              |                              | western blot                       | skeletal muscle                                            | Foditsch et al. 2016 [57]      |
| calpain 1 ( $\mu$ -calpain)                                                                                              |                              | casein zymography                  | skeletal muscle                                            | Pittner et al. 2016 [23]       |
| calpain 1 ( $\mu$ -calpain)                                                                                              |                              | casein zymography                  | skeletal muscle                                            | Pittner et al. 2016 [40]       |
| calpain 1 ( $\mu$ -calpain)                                                                                              |                              | western blot                       | skeletal muscle                                            | Pittner et al. 2017 [41]       |
| calpain 2 (m-calpain)                                                                                                    |                              | casein zymography                  | skeletal muscle                                            | Pittner et al. 2016 [23]       |
| calpain 2 (m-calpain)                                                                                                    |                              | casein zymography                  | skeletal muscle                                            | Pittner et al. 2016 [40]       |
| calpain 2 (m-calpain)                                                                                                    |                              | casein zymography                  | skeletal muscle                                            | Pittner et al. 2017 [41]       |
| calsequestrin 1                                                                                                          |                              | western blot                       | skeletal muscle                                            | Foditsch et al. 2016 [57]      |
| cardiac myosin heavy chain 5                                                                                             |                              | 2D-PAGE                            | heart                                                      | Kwak et al. 2017 [52]          |
| cardiac troponin I                                                                                                       | cTnI                         | mass spectrometry                  | heart                                                      | Sabucedo and Furton 2003 [35]  |
| cardiac troponin T                                                                                                       |                              | western blot                       | skeletal muscle                                            | Foditsch et al. 2016 [57]      |
| cardiac troponin T                                                                                                       |                              | western blot                       | heart                                                      | Kumar et al. 2015 [36]         |
| cardiac troponin T                                                                                                       |                              | western blot                       | heart                                                      | Kumar et al. 2015 [37]         |
| cardiac troponin T                                                                                                       |                              | western blot                       | heart                                                      | Kumar et al. 2015 [38]         |
| cardiac troponin T                                                                                                       |                              | western blot                       | heart                                                      | Kumar et al. 2016 [39]         |
| cardiac troponin T                                                                                                       | cTnT                         | western blot                       | skeletal muscle                                            | Pittner et al. 2016 [23]       |
| cardiac troponin T                                                                                                       | cTnT                         | western blot                       | skeletal muscle                                            | Pittner et al. 2016 [40]       |
| cardiac troponin T                                                                                                       | cTnT                         | western blot                       | skeletal muscle                                            | Pittner et al. 2017 [41]       |
| cartilage intermediate layer protein 1                                                                                   | CILP                         | mass spectrometry                  | bone                                                       | Prieto-Bonete et al. 2018 [25] |
| cartilage oligomerix matrix protein                                                                                      | COMP                         | mass spectrometry                  | bone                                                       | Prieto-Bonete et al. 2018 [25] |
| caspase 3                                                                                                                |                              | immunohistochemistry, western blot | kidney, skeletal muscle                                    | Lee et al. 2016 [50]           |
| catalase                                                                                                                 | CAT                          | enzyme activity assay              | heart, kidney                                              | Abo El-Noor et al. 2016 [49]   |
| collagen                                                                                                                 |                              | histology                          | cartilage                                                  | Alibegović et al. 2019 [46]    |
| collagen                                                                                                                 |                              | histology/photometry               | bone                                                       | Boaks et al. 2014 [55]         |
| collagen                                                                                                                 |                              | histology, histology/photometry    | bone                                                       | Jellinghaus et al. 2018 [58]   |
| collagen                                                                                                                 |                              | histology, histology/photometry    | bone                                                       | Jellinghaus et al. 2019 [45]   |
| collagen alpha-1 (V)                                                                                                     | COL5A1                       | mass spectrometry                  | bone                                                       | Prieto-Bonete et al. 2018 [25] |
| collagen alpha-1(II) chain                                                                                               | COL1A1                       | mass spectrometry                  | bone                                                       | Prieto-Bonete et al. 2018 [25] |
| collagen alpha-1(III) chain                                                                                              | COL3A1                       | mass spectrometry                  | bone                                                       | Prieto-Bonete et al. 2018 [25] |
| collagen alpha-1(IX) chain                                                                                               | COL9A1                       | mass spectrometry                  | bone                                                       | Prieto-Bonete et al. 2018 [25] |
| collagen alpha-1(VII) chain precursor                                                                                    | COL7A1                       | mass spectrometry                  | bone                                                       | Prieto-Bonete et al. 2018 [25] |
| collagen alpha-1(X)                                                                                                      | COL10A1                      | mass spectrometry                  | bone                                                       | Prieto-Bonete et al. 2018 [25] |
| collagen alpha-1(XI) chain                                                                                               | COL11A1                      | mass spectrometry                  | bone                                                       | Prieto-Bonete et al. 2018 [25] |
| collagen alpha-1(XXVII) chain preproprotein                                                                              | COL27A1                      | mass spectrometry                  | bone                                                       | Prieto-Bonete et al. 2018 [25] |
| collagen alpha-2(I)                                                                                                      | COL1A2                       | mass spectrometry                  | bone                                                       | Prieto-Bonete et al. 2018 [25] |
| collagen alpha-2(IV) chain preproprotein                                                                                 | COL4A2                       | mass spectrometry                  | bone                                                       | Prieto-Bonete et al. 2018 [25] |
| collagen alpha-2(IX) chain,                                                                                              | COL9A2                       | mass spectrometry                  | bone                                                       | Prieto-Bonete et al. 2018 [25] |
| collagen alpha-2(V) chain                                                                                                | COL5A2                       | mass spectrometry                  | bone                                                       | Prieto-Bonete et al. 2018 [25] |
| collagen alpha-2(XI) chain                                                                                               | COL11A2                      | mass spectrometry                  | bone                                                       | Prieto-Bonete et al. 2018 [25] |
| collagen type 1                                                                                                          |                              | mass spectrometry                  | bone                                                       | Pérez-Martínez e al. 2017 [42] |
| collagen type 5                                                                                                          | CO5A2 (vermutl falsch abgek) | mass spectrometry                  | bone                                                       | Procopio et al. 2018 [59]      |
| creatine kinase M type                                                                                                   | KCRM                         | mass spectrometry                  | bone                                                       | Procopio et al. 2018 [59]      |
| creatine kinase, muscle                                                                                                  |                              | 2D-PAGE                            | heart                                                      | Kwak et al. 2017 [52]          |
| CST complex subunit CTC1                                                                                                 | CTC1                         | mass spectrometry                  | bone                                                       | Prieto-Bonete et al. 2018 [25] |
| desmin                                                                                                                   | DES                          | western blot                       | skeletal muscle                                            | Choi et al. 2019 [47]          |
| desmin                                                                                                                   | DE-R-11                      | western blot                       | skeletal muscle                                            | Foditsch et al. 2016 [57]      |
| desmin                                                                                                                   |                              | 2D- PAGE                           | heart                                                      | Kwak et al. 2017 [52]          |
| desmin                                                                                                                   | DES                          | western blot                       | skeletal muscle                                            | Pittner et al. 2016 [23]       |
| desmin                                                                                                                   | DES                          | western blot                       | skeletal muscle                                            | Pittner et al. 2016 [40]       |
| desmin                                                                                                                   | DES                          | western blot                       | skeletal muscle                                            | Pittner et al. 2017 [41]       |
| desmin                                                                                                                   | DES                          | western blot                       | skeletal muscle                                            | Zissler et al. 2018 [51]       |
| ectonucleotide pyrophosphatase/phosphodiesterase family member 1                                                         | ENPP1                        | mass spectrometry                  | bone                                                       | Prieto-Bonete et al. 2018 [25] |
| eucaryotic translation elongation factor 1 alpha 2                                                                       | eEF1A2                       | mass spectrometry, western blot    | skeletal muscle                                            | Choi et al. 2019 [47]          |
| fibrillin-1                                                                                                              | FBN1                         | mass spectrometry                  | bone                                                       | Prieto-Bonete et al. 2018 [25] |
| fibroblast growth factor receptor 1                                                                                      | FGFR1                        | mass spectrometry                  | bone                                                       | Prieto-Bonete et al. 2018 [25] |
| fructose-bisphosphate aldolase A                                                                                         | ALDOA                        | mass spectrometry                  | bone                                                       | Procopio et al. 2018 [59]      |
| glial fibrillary acidic protein                                                                                          | GFAP                         | immunohistochemistry               | brain, pankreas                                            | Wehner et al. 2006 [29]        |

| protein                                                                                       | abbreviation       | method                             | tissue                                | reference                      |
|-----------------------------------------------------------------------------------------------|--------------------|------------------------------------|---------------------------------------|--------------------------------|
| glial fibrillary acidic protein                                                               | GFAP               | immunohistochemistry               | brain, pancreas                       | Wehner et al. 2006 [29]        |
| glucagon                                                                                      |                    | immunohistochemistry               | pancreas                              | Ortmann et al. 2017 [43]       |
| glucagon                                                                                      |                    | immunohistochemistry               | pancreas                              | Wehner et al. 2001 [30]        |
| glutathione S transferase                                                                     | GST                | enzyme activity assay              | heart, kidney                         | Abo El-Noor et al. 2016 [49]   |
| glutathione S-transferase alpha-5                                                             |                    | 2D-PAGE                            | liver                                 | Kwak et al. 2017 [52]          |
| glutathione S-transferase mu 2                                                                |                    | 2D-PAGE                            | liver                                 | Kwak et al. 2017 [52]          |
| glutathione synthetase                                                                        |                    | 2D-PAGE                            | liver                                 | Kwak et al. 2017 [52]          |
| glutathione-S-transferase                                                                     | GST                | enzyme activity assay              | brain, liver, skeletal muscle, kidney | da Fonseca et al. 2019 [60]    |
| glutathione reductase                                                                         | GR                 | enzyme activity assay              | heart, kidney                         | Abo El-Noor et al. 2016 [49]   |
| glyceraldehyd-3-phosphat-Dehydrogenase                                                        | GAPDH              | mass spectrometry, western blot    | skeletal muscle                       | Choi et al. 2019 [47]          |
| glyceraldehyd-3-phosphat-Dehydrogenase                                                        | GAPDH              | lateral flow assay, western blot   | kidney, skeletal muscle               | Lee et al. 2016 [50]           |
| glycogen synthase                                                                             | GS                 | immunohistochemistry, western blot | kidney, skeletal muscle               | Lee et al. 2016 [50]           |
| glycogen synthase kinase-3 β                                                                  | GSK-3β             | western blot                       | kidney                                | Lee et al. 2016 [50]           |
| haemoglobin beta                                                                              | HBB                | mass spectrometry                  | bone                                  | Procopio et al. 2018 [59]      |
| haeoglobin alpha                                                                              | HBA                | mass spectrometry                  | bone                                  | Procopio et al. 2018 [59]      |
| haptoglobin                                                                                   | HPT                | mass spectrometry                  | bone                                  | Procopio et al. 2018 [59]      |
| histone H2A deubiquitinase MYSM1 MYSM1                                                        |                    | mass spectrometry                  | bone                                  | Prieto-Bonete et al. 2018 [25] |
| homeobox protein DLX-5                                                                        | DLX5               | mass spectrometry                  | bone                                  | Prieto-Bonete et al. 2018 [25] |
| hydroxyacylglutathione hydrolase                                                              |                    | 2D-PAGE                            | liver                                 | Kwak et al. 2017 [52]          |
| inducible nitric oxide synthase                                                               | iNOS               | western blot                       | lung, skeletal muscle                 | Kang et al. 2003 [48]          |
| insulin                                                                                       |                    | immunohistochemistry               | pancreas                              | Ortmann et al. 2017 [43]       |
| insulin                                                                                       |                    | immunohistochemistry               | pancreas                              | Wehner et al. 1999 [31]        |
| insulin-induced gene 2 protein                                                                | INSIG2             | mass spectrometry                  | bone                                  | Prieto-Bonete et al. 2018 [25] |
| lactate dehydrogenase B                                                                       |                    | 2D-PAGE                            | heart                                 | Kwak et al. 2017 [52]          |
| lactotransferrin                                                                              | TRFL               | mass spectrometry                  | bone                                  | Procopio et al. 2018 [59]      |
| laminin                                                                                       |                    | western blot                       | skeletal muscle                       | Foditsch et al. 2016 [57]      |
| laminin subunit alpha-2                                                                       | LAMA2              | mass spectrometry                  | bone                                  | Prieto-Bonete et al. 2018 [25] |
| malate dehydrogenase 1, nicotinamide adenine dinucleotide (soluble)                           |                    | 2D-PAGE                            | heart                                 | Kwak et al. 2017 [52]          |
| matrix Gla protein                                                                            | MGP                | mass spectrometry                  | bone                                  | Procopio et al. 2018 [59]      |
| mediator of RNA polymerase II transcription subunit 12                                        | MED12              | mass spectrometry                  | bone                                  | Prieto-Bonete et al. 2018 [25] |
| mucin-15                                                                                      | MUC15              | mass spectrometry                  | bone                                  | Prieto-Bonete et al. 2018 [25] |
| myoglobin                                                                                     |                    | western blot                       | heart, skeletal muscle                | Li et al. 2016 [27]            |
| myosin heavy chain 2                                                                          | MYH2               | mass spectrometry                  | bone                                  | Procopio et al. 2018 [59]      |
| myosin heavy chain 6                                                                          | MYH6               | mass spectrometry                  | bone                                  | Procopio et al. 2018 [59]      |
| myristoylated alanine-rich C-kinase substrate                                                 | MARCKS             | western blot                       | lung, skeletal muscle                 | Kang et al. 2003 [48]          |
| myristoylated alanine-rich C-kinase substrate                                                 | MARCKS             | western blot                       | lung, skeletal muscle                 | Poloz et al. 2009 [24]         |
| Na <sup>+</sup> /K <sup>+</sup> ATPase                                                        |                    | enzyme activity assay              | brain, liver, skeletal muscle, kidney | da Fonseca et al. 2019 [60]    |
| nebulin                                                                                       |                    | western blot                       | skeletal muscle                       | Foditsch et al. 2016 [57]      |
| nebulin                                                                                       |                    | western blot                       | skeletal muscle                       | Pittner et al. 2016 [23]       |
| nicotinamide adenine dinucleotide phosphat dehydrogenase (ubiquinone), Fe_S protein 3         |                    | 2D-PAGE                            | heart                                 | Kwak et al. 2017 [52]          |
| nicotinamide adenine dinucleotide phosphat dehydrogenase (ubiquinone), flavoprotein 1, 51 kDa |                    | 2D-PAGE                            | heart                                 | Kwak et al. 2017 [52]          |
| p53                                                                                           |                    | western blot                       | kidney                                | Lee et al. 2016 [50]           |
| pappalysin-1                                                                                  | PAPPA              | mass spectrometry                  | bone                                  | Prieto-Bonete et al. 2018 [25] |
| parkinson disease protein 7                                                                   |                    | 2D-PAGE                            | liver                                 | Kwak et al. 2017 [52]          |
| peroxidasin homolog                                                                           | PXDN               | mass spectrometry                  | bone                                  | Prieto-Bonete et al. 2018 [25] |
| peroxisome proliferator-activated receptor gamma                                              | PPAR-γ             | western blot                       | kidney                                | Lee et al. 2016 [50]           |
| phosphoethanolamine/phosphocholine phosphatase isoform 1                                      | PHOSPO1            | mass spectrometry                  | bone                                  | Prieto-Bonete et al. 2018 [25] |
| prelamin A/C                                                                                  | LMNA               | mass spectrometry                  | bone                                  | Prieto-Bonete et al. 2018 [25] |
| procollagen C-endopeptidase enhancer 1 precursor                                              | PCOLCE             | mass spectrometry                  | bone                                  | Prieto-Bonete et al. 2018 [25] |
| protein disulphide-isomerase                                                                  | PDIA1              | mass spectrometry                  | bone                                  | Procopio et al. 2018 [59]      |
| protein jagged-2                                                                              | JAG2               | mass spectrometry                  | bone                                  | Prieto-Bonete et al. 2018 [25] |
| protein phosphatase 2                                                                         | PP2A               | western blot                       | lung, skeletal muscle                 | Poloz et al. 2009 [24]         |
| proteoglycan                                                                                  |                    | histology                          | cartilage                             | Alibegović et al. 2019 [46]    |
| receptor for advanced glycation end products                                                  | RAGE               | immunohistochemistry, western blot | lung                                  | Cho and Eom 2019 [54]          |
| Sarco/endoplasmic reticulum Ca 2 <sup>+</sup> -ATPase 1                                       | SERCA 2            | western blot                       | skeletal muscle                       | Foditsch et al. 2016 [57]      |
| Sarco/endoplasmic reticulum Ca 2 <sup>+</sup> -ATPase 1                                       | SERCA 1            | western blot                       | skeletal muscle                       | Foditsch et al. 2016 [57]      |
| sarco/endoplasmic reticulum Ca 2 <sup>+</sup> -ATPase 1                                       | SERCA 1            | western blot                       | skeletal muscle                       | Pittner et al. 2016 [23]       |
| scavenger receptor cysteine-rich type 1 protein M160                                          | CD163L1            | mass spectrometry                  | bone                                  | Prieto-Bonete et al. 2018 [25] |
| serum albumin precursor                                                                       |                    | 2D-PAGE                            | liver                                 | Kwak et al. 2017 [52]          |
| serum transferrin                                                                             | TRFE               | mass spectrometry                  | bone                                  | Procopio et al. 2018 [59]      |
| somatostatin                                                                                  |                    | immunohistochemistry               | brain, pancreas                       | Wehner et al. 2006 [29]        |
| stress-70 protein, mitochondrial precursor                                                    |                    | 2D-PAGE                            | liver                                 | Kwak et al. 2017 [52]          |
| sulfate transporter SLC26A2                                                                   |                    | mass spectrometry                  | bone                                  | Prieto-Bonete et al. 2018 [25] |
| SUN domain-containing ossification                                                            | SUCO               | mass spectrometry                  | bone                                  | Prieto-Bonete et al. 2018 [25] |
| thyroglobulin                                                                                 |                    | immunohistochemistry               | thyroid gland                         | Ortmann et al. 2017 [43]       |
| thyroglobulin                                                                                 |                    | immunohistochemistry               | thyroid gland                         | Wehner et al. 2000 [33]        |
| titin                                                                                         |                    | western blot                       | skeletal muscle                       | Foditsch et al. 2016 [57]      |
| titin                                                                                         |                    | western blot                       | skeletal muscle                       | Pittner et al. 2016 [23]       |
| Tnnt2 protein                                                                                 | Cardiac troponin T | 2D-PAGE                            | heart                                 | Kwak et al. 2017 [52]          |
| transcription factor MAF                                                                      | MAF                | mass spectrometry                  | bone                                  | Prieto-Bonete et al. 2018 [25] |
| transcription factor SOX-6 SOX6                                                               |                    | mass spectrometry                  | bone                                  | Prieto-Bonete et al. 2018 [25] |
| transcriptional protein SWT1 WNT11                                                            |                    | mass spectrometry                  | bone                                  | Prieto-Bonete et al. 2018 [25] |
| transferrin                                                                                   |                    | 2D-PAGE                            | heart                                 | Kwak et al. 2017 [52]          |
| triosephosphat isomerase                                                                      | TPIS               | mass spectrometry                  | bone                                  | Procopio et al. 2018 [59]      |
| tropomyosin                                                                                   | TPM                | western blot                       | skeletal muscle                       | Choi et al. 2019 [47]          |
| tropomyosin                                                                                   | CH1                | western blot                       | skeletal muscle                       | Foditsch et al. 2016 [57]      |
| tropomyosin                                                                                   | TPM                | western blot                       | skeletal muscle                       | Pittner et al. 2016 [23]       |
| tropomyosin                                                                                   | TPM                | western blot                       | skeletal muscle                       | Pittner et al. 2016 [40]       |
| tropomyosin                                                                                   | TPM                | western blot                       | skeletal muscle                       | Pittner et al. 2017 [41]       |
| tropomyosin                                                                                   | TPM                | western blot                       | skeletal muscle                       | Zissler et al. 2018 [51]       |
| tropomyosin 1, alpha isoform d                                                                |                    | 2D-PAGE                            | liver                                 | Kwak et al. 2017 [52]          |
| troponin I                                                                                    |                    | western blot                       | skeletal muscle                       | Li et al. 2016 [27]            |
| tubulin                                                                                       |                    | western blot                       | heart, lung                           | Li et al. 2016 [27]            |
| tubulin, beta 6                                                                               |                    | 2D-PAGE                            | liver                                 | Kwak et al. 2017 [52]          |
| vascular endothelial growth factor                                                            | VEGF               | ELISA                              | brain                                 | Thaik-Oo et al. 2002 [34]      |
| vinculin                                                                                      | VCL                | western blot                       | skeletal muscle                       | Choi et al. 2019 [47]          |
| vinculin                                                                                      |                    | western blot                       | skeletal muscle                       | Zissler et al. 2018 [51]       |
| zinc finger CCHC domain-containing protein 12                                                 |                    | mass spectrometry                  | bone                                  | Prieto-Bonete et al. 2018 [25] |
