# Supplementary material for: Postmortem Protein Degradation as a Tool to Estimate the PMI: A Systematic Review
Source: MDPI journal article supplement (doi:10.3390/diagnostics10121014), 2020-11-26
Supplement: s1 [file s1]

|                                          |                                                                                                                                                                    | Wehner et al. 1998 [31] | Wehner et al. 2000 [33] | Wehner et al. 2001 [32] | Wehner et al. 2001 [30] | Thaik-Do et al. 2002 [34] | Kang et al. 2003 [48] | Sabucedo and Furlon 2003 [35] | Wehner et al. 2006 [29] | Poloz and O'Day 2009 [24] | Boake et al. 2014 [55] | Bolton et al. 2015 [56] | Kumar et al. 2015 [37] | Kumar et al. 2015 [36] | Kumar et al. 2015 [38] | Abo El-Noor et al. 2016 [49] | Lee et al. 2016 [50] | Kumar et al. 2016 [39] | Fodilich et al. 2016 [57] | Pittner et al. 2016 [23] | Pittner et al. 2016 [40] | Kwak et al. 2017 [52] | Li et al. 2017 [44] | Li et al. 2017 [53] | Ortmann et al. 2017 [43] | Pérez-Martínez et al. 2017 [42] | Pittner et al. 2017 [41] | Jellingshaus et al. 2018 [58] | Prieto-Bonete et al. 2018 [25] | Procopio et al. 2018 [59] | Zissler et al. 2018 [51] | Alibegovic et al. 2019 [46] | Cho and Eom 2019 [54] | Choi et al. 2019 [47] | da Fonseca et al. 2019 [60] | Jellingshaus et al. 2019 [45] |        |        |        |     |
|------------------------------------------|--------------------------------------------------------------------------------------------------------------------------------------------------------------------|-------------------------|-------------------------|-------------------------|-------------------------|---------------------------|-----------------------|-------------------------------|-------------------------|---------------------------|------------------------|-------------------------|------------------------|------------------------|------------------------|------------------------------|----------------------|------------------------|---------------------------|--------------------------|--------------------------|-----------------------|---------------------|---------------------|--------------------------|---------------------------------|--------------------------|-------------------------------|--------------------------------|---------------------------|--------------------------|-----------------------------|-----------------------|-----------------------|-----------------------------|-------------------------------|--------|--------|--------|-----|
| Bias arising from study design           | 1.1 Was the sample size chosen adequately (to appropriately address the research hypothesis)? (Y/PY/NP/NI)                                                         | Y                       | Y                       | Y                       | Y                       | PY                        | PY                    | PN                            | Y                       | Y                         | PN                     | PN                      | PN                     | N                      | PN                     | Y                            | Y/N <sup>1</sup>     | N                      | N                         | PY                       | Y                        | PN                    | PY                  | N                   | Y                        | Y                               | Y                        | N                             | Y                              | Y                         | N                        | PY                          | N                     | Y                     | Y                           | Y/N <sup>4</sup>              | Y      | Y      |        |     |
|                                          | 1.2.1 If Y/PY to 1.1 Were appropriate control samples used that serve as references/comparative values within the outcome analysis domain? (Y/PY/NP/NI)            | Y                       | Y                       | Y                       | Y                       | Y                         | Y                     | Y                             | Y                       | Y                         | Y                      | Y                       | Y                      | Y                      | Y                      | Y                            | Y/N <sup>1</sup>     | Y                      | Y                         | Y                        | Y                        | Y                     | Y                   | Y                   | Y                        | Y                               | Y                        | Y                             | Y                              | Y                         | Y                        | Y                           | Y                     | Y                     | Y                           | Y/N <sup>4</sup>              | Y      | Y      |        |     |
|                                          | 1.2.2 If Y/PY to 1.2.1 Was there any effort to reduce risk of bias in selecting an appropriate population fitting into the context of the study? (Y/PY/NP/NI)      | Y                       | Y                       | Y                       | Y                       | N                         | Y                     | Y                             | Y                       | Y                         | PY                     |                         |                        |                        |                        |                              | Y                    | Y/N <sup>1</sup>       |                           |                          | Y                        | Y                     |                     | Y                   |                          |                                 |                          |                               |                                |                           |                          | Y                           | Y                     | Y                     | Y/N <sup>4</sup>            | Y                             | Y      |        |        |     |
|                                          | Risk of bias judgement                                                                                                                                             | MOJ                     | MOJ                     | MOJ                     | MOJ                     | apapou                    | MOJ                   | MOJ                           | MOJ                     | MOJ                       | MOJ                    | MOJ                     | MOJ                    | MOJ                    | MOJ                    | MOJ                          | MOJ                  | MOJ                    | MOJ                       | MOJ                      | MOJ                      | MOJ                   | MOJ                 | MOJ                 | MOJ                      | MOJ                             | MOJ                      | apapou                        | MOJ                            | apapou                    | apapou                   | apapou                      | MOJ                   | MOJ                   | MOJ                         | MOJ                           | MOJ    | MOJ    | apapou |     |
| Bias due to imprecise reporting          | 2.1 Was the study design and outcome reported consistently and unambiguously?                                                                                      | Y                       | Y                       | Y                       | Y                       | Y                         | Y                     | N                             | Y                       | Y                         | Y                      | Y                       | N                      | N                      | N                      | Y                            | Y                    | N                      | N                         | Y                        | Y                        | Y                     | Y                   | Y                   | Y                        | Y                               | Y                        | Y                             | Y                              | Y                         | Y                        | Y                           | Y                     | Y                     | Y                           | Y                             | Y      | Y      | N      |     |
|                                          | 2.2 Was the sampling (procedure and site) reported comprehensively? (Y/N)                                                                                          | Y                       | Y                       | Y                       | Y                       | Y                         | Y                     | N                             | N                       | Y                         | N                      | Y                       | N                      | N                      | N                      | N                            | Y                    | Y                      | N                         | Y                        | Y                        | Y                     | Y                   | Y                   | Y                        | Y                               | Y                        | N                             | Y                              | Y                         | Y                        | Y                           | Y                     | Y                     | Y                           | Y                             | Y      | N      |        |     |
|                                          | 2.3 Were influencing factors and/or environmental conditions reported that possibly influence the outcome domain? (Y/N)                                            | Y                       | Y                       | Y                       | Y                       | N                         | Y                     | Y                             | Y                       | Y                         | Y                      | N                       | Y                      | Y                      | N                      | N                            | Y                    | Y                      | Y                         | Y                        | Y                        | Y                     | Y                   | Y                   | Y                        | Y                               | Y                        | Y                             | Y                              | Y                         | N                        | Y                           | Y                     | Y                     | Y                           | Y                             | Y      | N      |        |     |
|                                          | 2.4 Were methodical steps reported comprehensively and traceable from sample preparation to data acquisition? (Y/N)                                                | N                       | N                       | N                       | N                       | Y                         | Y                     | Y                             | N                       | N                         | Y                      | Y                       | Y                      | Y                      | Y                      | Y                            | Y                    | Y                      | Y                         | Y                        | Y                        | Y                     | Y                   | Y                   | Y                        | N                               | Y                        | Y                             | Y                              | Y                         | Y                        | Y                           | Y                     | Y                     | Y                           | Y                             | Y      | Y      |        |     |
| Bias due to imprecise reporting          | 2.5 Were details reported regarding the measurement procedure and data analysis that are essential for the outcome domain (endpoint of interest)? (Y/N)            | N                       | N                       | N                       | N                       | N                         | Y                     | N                             | N                       | Y                         | Y                      | N                       | N                      | N                      | N                      | Y                            | Y/N <sup>2</sup>     | N                      | N                         | N                        | Y                        | N                     | Y                   | Y                   | Y                        | N                               | Y                        | Y                             | Y                              | Y                         | Y                        | Y                           | Y                     | Y                     | Y/N <sup>3</sup>            | Y                             | Y      | Y      |        |     |
|                                          | Risk of bias judgement                                                                                                                                             | MOJ                     | MOJ                     | MOJ                     | MOJ                     | MOJ                       | apapou                | MOJ                           | MOJ                     | apapou                    | apapou                 | apapou                  | MOJ                    | MOJ                    | MOJ                    | MOJ                          | MOJ                  | apapou                 | apapou                    | apapou                   | apapou                   | MOJ                   | apapou              | MOJ                 | MOJ                      | MOJ                             | MOJ                      | MOJ                           | apapou                         | MOJ                       | MOJ                      | MOJ                         | apapou                | MOJ                   | MOJ                         | MOJ                           | MOJ    | MOJ    | MOJ    | MOJ |
|                                          | 3.1 Were outcome data available for all, or nearly all, samples used? (Y/PY/NP/NI)                                                                                 | Y                       | Y                       | Y                       | Y                       | N                         | Y                     | PY                            | PN                      | Y                         | Y                      | PY                      | PY                     | PY                     | N                      | Y                            | Y/N                  | N                      | PY                        | Y                        | Y                        | Y                     | Y                   | Y                   | Y                        | Y                               | Y                        | Y                             | Y                              | Y                         | Y                        | Y                           | Y                     | Y                     | Y                           | Y                             | Y      | PY     |        |     |
|                                          | 3.2.1 If NP/NI to 3.1 Are the proportions of missing outcome data similar across study groups? (Y/PY/NP/NI)                                                        |                         |                         |                         |                         | PN                        |                       |                               | N                       |                           |                        |                         |                        |                        | NI                     |                              | NI                   |                        |                           |                          |                          |                       |                     |                     |                          |                                 |                          |                               |                                |                           |                          |                             |                       |                       |                             |                               |        |        |        |     |
| Bias due to missing outcome data         | 3.2.2 If NP/NI to 3.1 Are the reasons for (partially) missing outcome data reported? (Y/N)                                                                         |                         |                         |                         |                         | N                         |                       | N                             |                         |                           |                        |                         |                        | N                      |                        | N                            |                      | N                      |                           |                          |                          |                       |                     |                     |                          |                                 |                          |                               |                                |                           |                          |                             |                       |                       |                             |                               |        |        |        |     |
|                                          | 3.2.3 If NP/NI to 3.1 Is there evidence that results were robust to the presence of missing outcome data? (Y/N/NI)                                                 |                         |                         |                         |                         | N                         |                       | NI                            |                         |                           |                        |                         |                        | N                      |                        | N                            |                      | N                      |                           |                          |                          |                       |                     |                     |                          |                                 |                          |                               |                                |                           |                          |                             |                       |                       |                             |                               |        |        |        |     |
|                                          | Risk of bias judgement                                                                                                                                             | MOJ                     | MOJ                     | MOJ                     | MOJ                     | MOJ                       | MOJ                   | MOJ                           | MOJ                     | MOJ                       | MOJ                    | MOJ                     | MOJ                    | MOJ                    | MOJ                    | MOJ                          | MOJ                  | MOJ                    | MOJ                       | MOJ                      | MOJ                      | MOJ                   | MOJ                 | MOJ                 | MOJ                      | MOJ                             | MOJ                      | MOJ                           | MOJ                            | MOJ                       | MOJ                      | MOJ                         | MOJ                   | MOJ                   | MOJ                         | MOJ                           | MOJ    | MOJ    |        |     |
|                                          | 4.1. Were outcome assessors aware of the study group/time point/individual sample data? (Y/PY/NI/NP/NI)                                                            | NI                      | NI                      | NI                      | NI                      | NI                        | NI                    | NI                            | NI                      | NI                        | NI                     | NI                      | NI                     | NI                     | NI                     | NI                           | NI                   | NI                     | NI                        | NI                       | NI                       | NI                    | NI                  | NI                  | NI                       | NI                              | NI                       | NI                            | NI                             | NI                        | NI                       | NI                          | NI                    | NI                    | NI                          | NI                            | NI     | N      |        |     |
| Bias in measurement of the outcome       | 4.2 If Y/PY/NI to 4.1 Was the assessment of the outcome likely to be influenced by knowledge of the study group/time point/individual sample data? (Y/PY/NI/NP/NI) | PY                      | PY                      | PY                      | PY                      | PN                        | PN                    | PN                            | PY                      | PN                        | PN                     | PY                      | PN                     | PN                     | PN                     | PN                           | PN                   | PN                     | PY                        | PY                       | PN                       | PN                    | PN                  | PN                  | PN                       | PY                              | PN                       | PN                            | PN                             | PN                        | PN                       | PN                          | PN                    | PN                    | PN                          | PN                            | PN     | PN     |        |     |
|                                          | Risk of bias judgement                                                                                                                                             | apapou                  | apapou                  | apapou                  | apapou                  | MOJ                       | MOJ                   | MOJ                           | apapou                  | MOJ                       | MOJ                    | apapou                  | MOJ                    | MOJ                    | MOJ                    | MOJ                          | MOJ                  | MOJ                    | apapou                    | apapou                   | apapou                   | MOJ                   | MOJ                 | MOJ                 | MOJ                      | apapou                          | MOJ                      | MOJ                           | MOJ                            | MOJ                       | MOJ                      | MOJ                         | MOJ                   | MOJ                   | MOJ                         | MOJ                           | MOJ    | MOJ    | MOJ    |     |
|                                          | 5.1 Are the reported outcome data likely to have been selected from multiple outcome measurements (methods, time points, conditions, etc.)? (Y/PY/NP/NI)           | N                       | N                       | N                       | N                       | PN                        | N                     | PN                            | N                       | N                         | N                      | N                       | PN                     | PN                     | PN                     | PN                           | N                    | PN                     | PY                        | PN                       | N                        | N                     | N                   | N                   | N                        | N                               | N                        | N                             | N                              | N                         | N                        | N                           | N                     | N                     | N                           | N                             | N      | PN     | PN     |     |
|                                          | 5.2 Are the reported outcome data likely to have been selected from multiple analyses of the data (values, percentages, ratios)? (Y/PY/NI/NP/NI)                   | N                       | N                       | N                       | N                       | N                         | N                     | N                             | N                       | N                         | N                      | N                       | N                      | N                      | N                      | N                            | N                    | N                      | N                         | N                        | N                        | N                     | N                   | N                   | N                        | N                               | N                        | PY                            | N                              | N                         | N                        | N                           | N                     | N                     | N                           | N                             | N      | N      | N      |     |
| Bias in selection of the reported result | Risk of bias judgement                                                                                                                                             | MOJ                     | MOJ                     | MOJ                     | MOJ                     | MOJ                       | MOJ                   | MOJ                           | MOJ                     | MOJ                       | MOJ                    | MOJ                     | MOJ                    | MOJ                    | MOJ                    | MOJ                          | MOJ                  | MOJ                    | MOJ                       | MOJ                      | MOJ                      | MOJ                   | MOJ                 | MOJ                 | MOJ                      | MOJ                             | MOJ                      | apapou                        | MOJ                            | MOJ                       | MOJ                      | MOJ                         | MOJ                   | MOJ                   | MOJ                         | MOJ                           | MOJ    | MOJ    | MOJ    |     |
|                                          | 6.1 Is there evidence that the same individuals were used in other included studies, published earlier? (Y/PY/NI/NP)                                               | N                       | Y                       | Y                       | Y                       | N                         | N                     | N                             | PY                      | N                         | N                      | N                       | N                      | N                      | PY                     | N                            | N                    | N                      | N                         | N                        | N                        | N                     | N                   | N                   | N                        | N                               | N                        | PY                            | PN                             | N                         | PY                       | N                           | N                     | N                     | N                           | PN                            | N      | N      |        |     |
|                                          | 6.2.1 If Y/PY to 6.1 Is there evidence that the same sample material was used in other included studies, published earlier? (Y/PY/NI/NP)                           |                         | N                       | Y                       | Y                       |                           |                       |                               | PY                      |                           |                        |                         |                        |                        |                        |                              |                      |                        |                           |                          |                          |                       |                     |                     |                          |                                 |                          |                               |                                |                           |                          |                             |                       |                       |                             |                               | PN     |        |        |     |
|                                          | 6.2.2 If Y/PY to 6.2.1 Is the multiple use of samples likely to affect meta-analysis? (Y/PY/NI/NP)                                                                 |                         |                         | N                       | N                       |                           |                       |                               | N                       |                           |                        |                         |                        |                        | Y                      |                              |                      |                        |                           |                          |                          |                       |                     |                     |                          |                                 |                          | PN                            |                                |                           |                          |                             |                       |                       |                             |                               | PN     |        |        |     |
| Bias arising from multiple use of data   | 6.3 If Y/PY to 6.2.1 Is there evidence that the same data were used in other included studies, published earlier? (Y/PY/NI/NP)                                     |                         | N                       | N                       | N                       |                           |                       | N                             |                         |                           |                        |                         |                        | PY                     |                        |                              |                      |                        |                           |                          |                          |                       |                     |                     |                          |                                 | N                        |                               |                                |                           |                          |                             |                       |                       |                             | N                             |        |        |        |     |
|                                          | Risk of bias judgement                                                                                                                                             | MOJ                     | apapou                  | apapou                  | apapou                  | MOJ                       | MOJ                   | MOJ                           | apapou                  | MOJ                       | MOJ                    | MOJ                     | MOJ                    | MOJ                    | MOJ                    | MOJ                          | MOJ                  | MOJ                    | MOJ                       | MOJ                      | MOJ                      | MOJ                   | MOJ                 | MOJ                 | MOJ                      | MOJ                             | apapou                   | apapou                        | MOJ                            | apapou                    | apapou                   | apapou                      | apapou                | apapou                | apapou                      | apapou                        | apapou | apapou | apapou |     |
|                                          | Risk of bias judgement                                                                                                                                             | MOJ                     | apapou                  | apapou                  | apapou                  | MOJ                       | MOJ                   | MOJ                           | apapou                  | MOJ                       | MOJ                    | MOJ                     | MOJ                    | MOJ                    | MOJ                    | MOJ                          | MOJ                  | MOJ                    | MOJ                       | MOJ                      | apapou                   | MOJ                   | MOJ                 | MOJ                 | MOJ                      | MOJ                             | apapou                   | apapou                        | MOJ                            | apapou                    | apapou                   | apapou                      | apapou                | apapou                | apapou                      | apapou                        | apapou | apapou |        |     |
|                                          | Risk of bias judgement                                                                                                                                             | MOJ                     | apapou                  | apapou                  | apapou                  | MOJ                       | MOJ                   | MOJ                           | apapou                  | MOJ                       | MOJ                    | MOJ                     | MOJ                    | MOJ                    | MOJ                    | MOJ                          | MOJ                  | MOJ                    | MOJ                       | MOJ                      | apapou                   | MOJ                   | MOJ                 | MOJ                 | MOJ                      | MOJ                             | apapou                   | apapou                        | MOJ                            | apapou                    | apapou                   | apapou                      | apapou                | apapou                | apapou                      | apapou                        | apapou | apapou |        |     |
| Overall Bias                             | Risk of bias judgement                                                                                                                                             | MOJ                     | MOJ                     | MOJ                     | MOJ                     | MOJ                       | apapou                | MOJ                           | MOJ                     | apapou                    | MOJ                    | MOJ                     | MOJ                    | MOJ                    | MOJ                    | MOJ                          | MOJ                  | MOJ                    | MOJ                       | apapou                   | MOJ                      | MOJ                   | MOJ                 | MOJ                 | MOJ                      | MOJ                             | apapou                   | apapou                        | MOJ                            | apapou                    | apapou                   | apapou                      | apapou                | apapou                | apapou                      | apapou                        | apapou | apapou | apapou |     |

<sup>1</sup> Y for WB and IHC, N for LFA  
<sup>2</sup> Y for WB analysis, N for IHC  
<sup>3</sup> Y for WB analysis, N for IHC  
<sup>4</sup> Y for WB analysis in rats, N for MS analysis in animals and human
