# Supplementary material for: Postmortem Protein Degradation as a Tool to Estimate the PMI: A Systematic Review
Source: Diagnostics (Basel). 2020 Nov 26;10(12):1014. doi: 10.3390/diagnostics10121014 (PMC7760775; doi:10.3390/diagnostics10121014)
Supplement: Supplementary file 1 [file diagnostics-10-01014-s001.zip]

Archive with 7 entries (7 files):
- diagnostics-989370-File S1.pdf
- diagnostics-989370-File S3.pdf
- diagnostics-989370-File S4.pdf
- File S2.pdf
- Table S1.pdf
- Table S2.pdf
- Table S3.pdf
